# Supplementary material
Source: publisher figshare collection journal article supplement (https://acs.figshare.com/ndownloader/files/5218735)
Supplement: Supplementary file 1 [file 5218735]

## Supporting Information

“Walljet Electrochemistry: Quantifying Molecular Transport through Metallopolymeric and Zirconium Phosphonate-Assembled Porphyrin Square Thin Films”

Aaron M. Massari, *et al.*

Corresponding author. Tel: +1-847-491-3504; FAX: +1-847-491-7713; email address: jthupp@chem.northwestern.edu

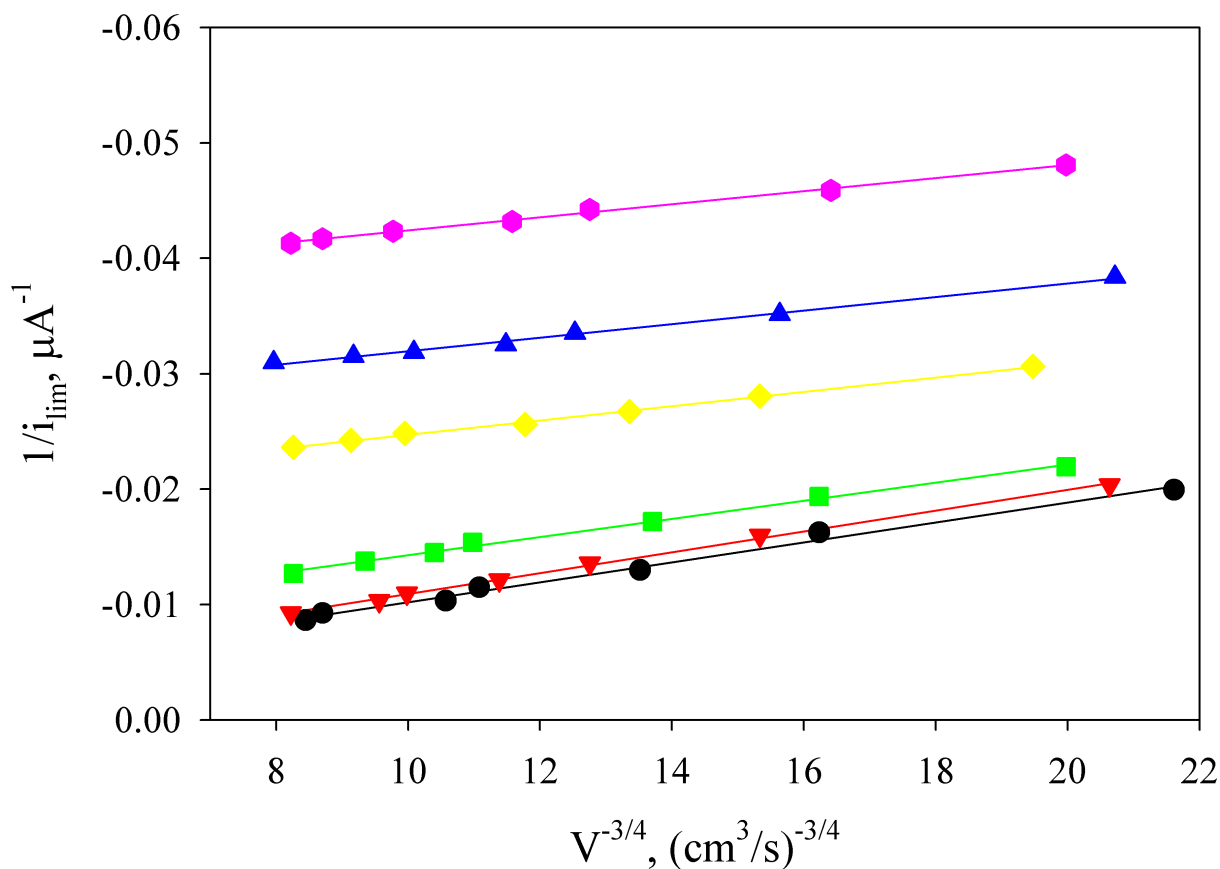

Shown is a representative plot of  $1/i_{\text{lim}}$  as a function of  $V^{3/4}$  for a sample series with varying thicknesses of ZrP-assembled **4** using FcMeOH as the redox permeant. Shown samples are bare ITO (●), 1 (▼), 3 (■), 5 (◆), 8 (▲), and 10 (⬤) layers. Although the film thicknesses are extremely thin (nanometers to tens of nanometers), the  $i_{\text{perm}}$  (i.e. y-axis offset) is clearly measurable, even with a small redox probe.
